# Supplementary material
Source: PubMed Central journal article supplement (PMC10066334)

# Supplementary Figure 1 Flow cytometry gating strategy

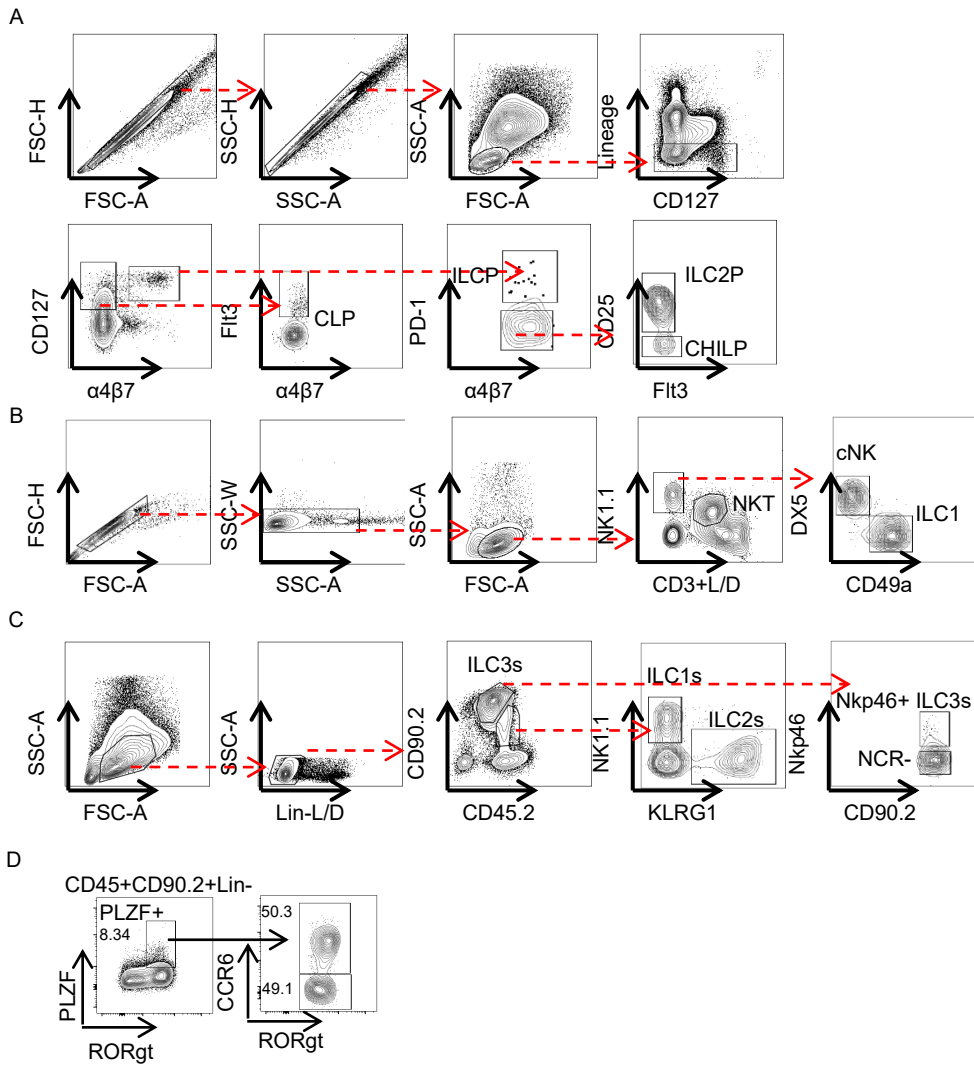

Supplementary Figure 2 Generation of PLZF Cre-ERT2/EGFP knock-in mice.

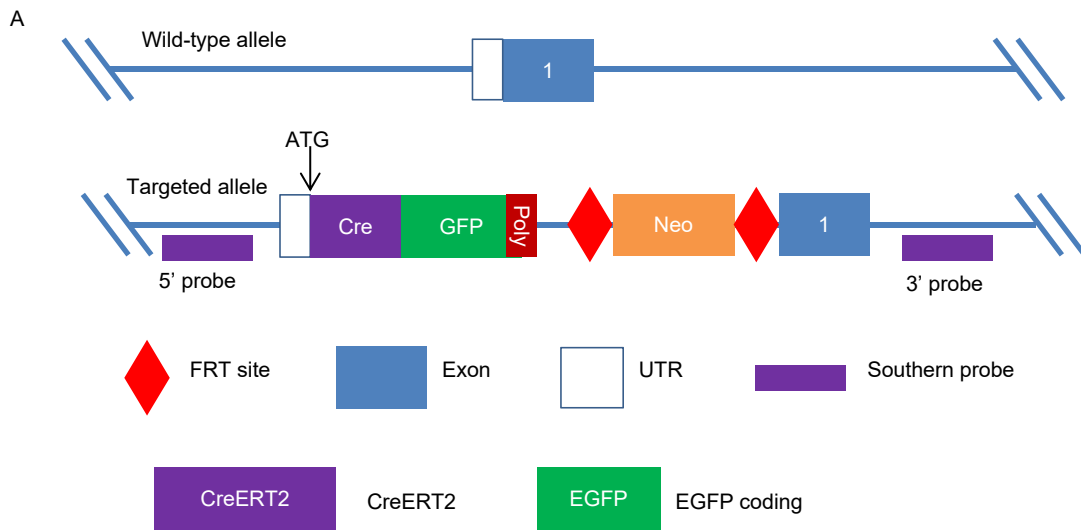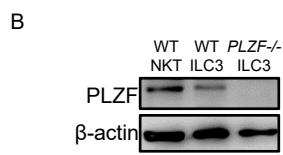

Supplementary Figure 3 PLZF deficiency does not affect the number of total ILCs.

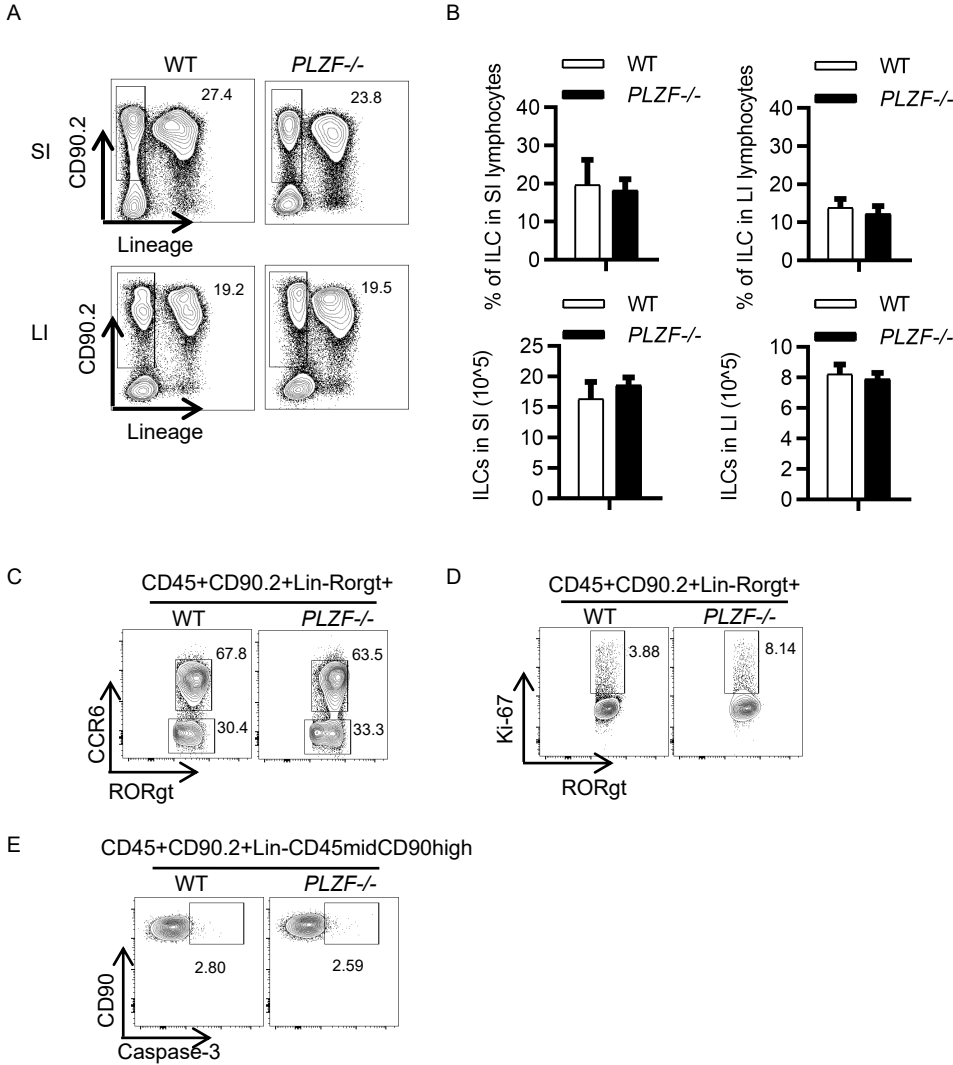

Supplementary Figure 4 Expression of ILC3s activation maker and homing receptors.

A

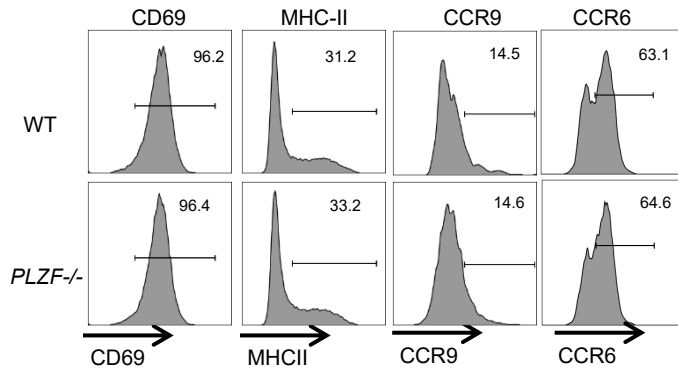

B

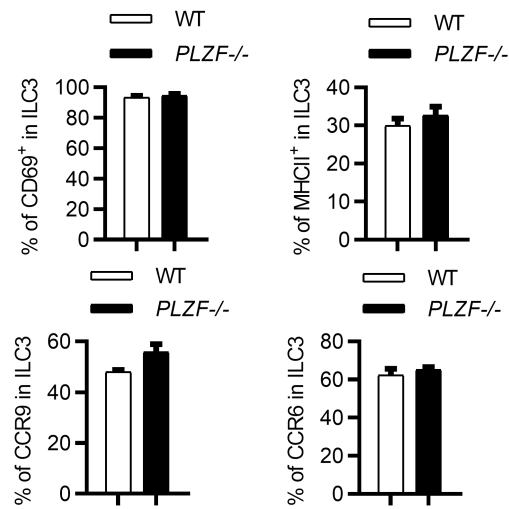

Supplementary Figure 5 The *Zbtb16* gene expression is downregulated in ILC3s under disease conditions.

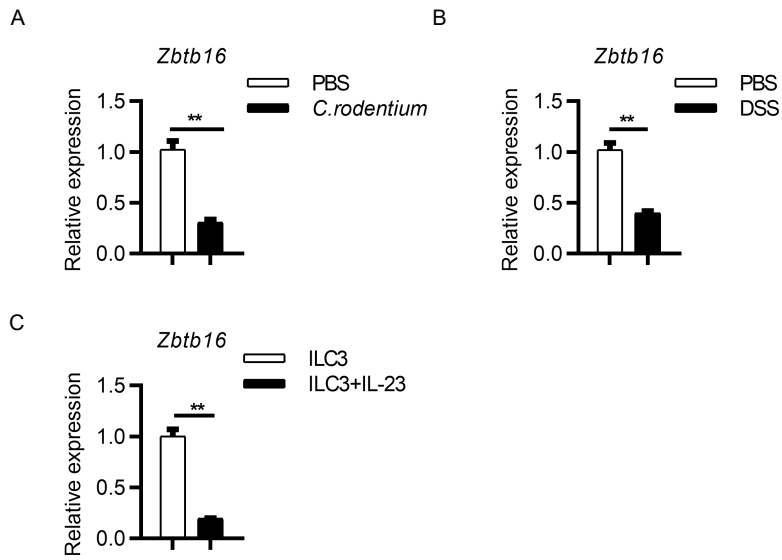

Supplementary Figure 6 IL-22 expression regulated by PLZF is not dependent on Rorc, AhR, and Stat3.

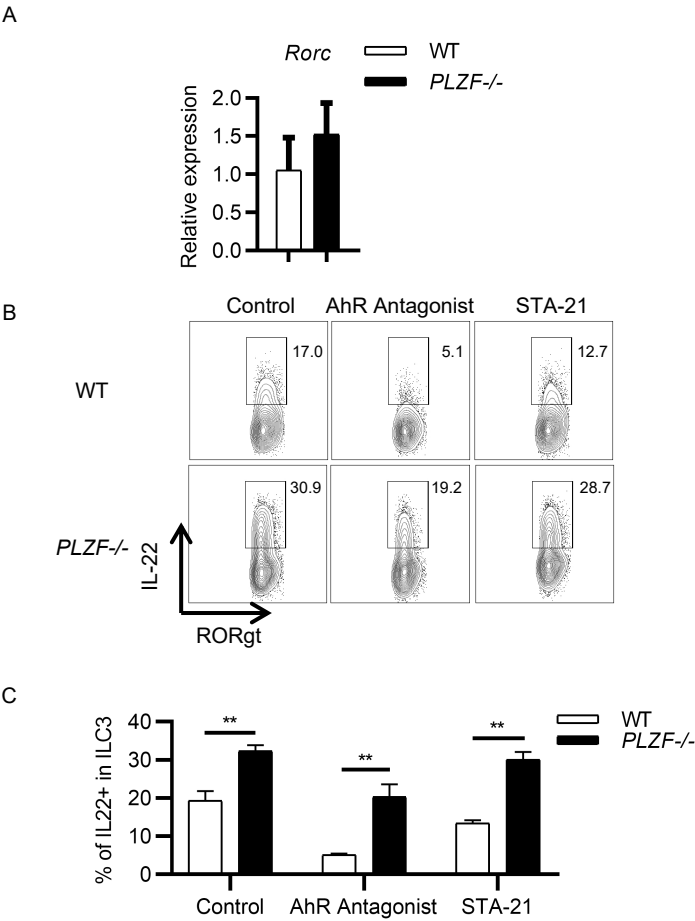

Supplementary Figure 7 PLZF specific binding motif

PLZF specific  
binding motif

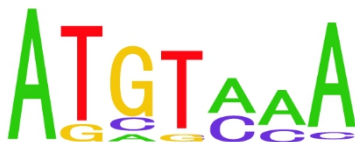

Table 1 Antibodies for flow cytometry staining

| Antibody          | Clone       | Vendor      |
|-------------------|-------------|-------------|
| CD16/32           | 93          | biolegend   |
| CD19              | 6D5         | biolegend   |
| CD11b             | M1/70       | biolegend   |
| $\alpha 4\beta 7$ | DAT1C32     | biolegend   |
| Live/Dead         | NA          | lifetech    |
| CD90.2            | 53-2.1      | ebioscience |
| GATA3             | TWAT        | ebioscience |
| C-kit             | 2B8         | biolegend   |
| CD25              | PC61.5      | ebioscience |
| NCR               | 29A1.4      | biolegend   |
| DX5               | DX5         | BD          |
| CD45.1            | A20         | biolegend   |
| IL-13             | eBio13A     | ebioscience |
| SiglecF           | E50-2440,   | BD          |
| IL-22             | Poly5164    | biolegend   |
| IL-17A            | eBio1787    | ebioscience |
| IFN- $\gamma$     | XMG1.2      | ebioscience |
| GM-CSF            | MP1-22E9    | BD          |
| CCR6              | 140706      | BD          |
| Ki67              | SolA15      | Ebioscience |
| CD3               | 145-2c11    | biolegend   |
| Gr-1              | RB6-8C5     | biolegend   |
| CD127             | A7R34       | biolegend   |
| PD-1              | RMP1-30     | ebioscience |
| CD45.2            | 104         | biolegend   |
| ROR $\gamma$ t    | AFKJS-9     | ebioscience |
| NK1.1             | PK136       | ebioscience |
| Sca-1             | D7          | biolegend   |
| IL-5              | TRFK5       | ebioscience |
| Flt3              | A2F10.1     | BD          |
| CD49a             | Ha31/8      | BD          |
| T-bet             | eBio-4B10   | ebioscience |
| CD11c             | N418,       | biolegend   |
| CD11b             | M1/70       | biolegend   |
| CD69              | H1.2F3      | ebioscience |
| DEVVD-FMK         | 9499-100    | BioVision   |
| PLZF              | R17-809     | BD          |
| MHCII             | M5/114.15.2 | BD          |



Table 2 The qPCR primers

| Primer                               | Sequence(5'to3')        |
|--------------------------------------|-------------------------|
| <i>Zbtb16</i> -F                     | CTGGGACTTTGTGCGATGTG    |
| <i>Zbtb16</i> -R                     | CGGTGGAAGAGGATCTCAAACA  |
| <i>Gapdh</i> -F                      | AGGTCGGTGTGAACGGATTTG   |
| <i>Gapdh</i> -R                      | TGTAGACCATGTAGTTGAGGTCA |
| <i>mI22</i> -F                       | TCAGTGCTAAGGATCAGTGCT   |
| <i>mI22</i> -R                       | TGATTGCTGAGTTTGGTCAGG   |
| <i>mRegIII<math>\gamma</math></i> -F | ATGGCTCCTATTGCTATGCC    |
| <i>mRegIII<math>\gamma</math></i> -R | GATGTCCTGAGGGCCTCTT     |
| <i>mRegIII<math>\beta</math></i> -F  | ATGGCTCCTACTGCTATGCC    |
| <i>mRegIII<math>\beta</math></i> -R  | GTGTCCTCCAGGCCTCTTT     |
| <i>mI22r</i> -F                      | GCTGGACTCCCTTGTGTGT     |
| <i>mI22r</i> -R                      | CACATGGCCTCAGTCTCAA     |
| <i>Rorc</i> -F                       | CCGCTGAGAGGGCTTCAC      |
| <i>Rorc</i> -R                       | TGCAGGAGTAGGCCACATTACA  |

# SourceDataF1E

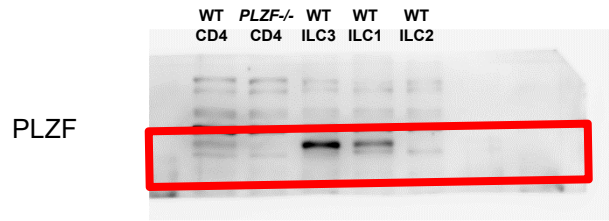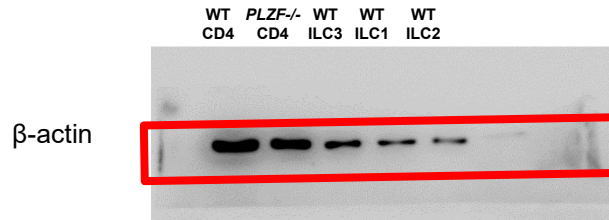

Supplement: 41423_2023_975_MOESM2_ESM.pdf [file 41423_2023_975_MOESM2_ESM.pdf]
